1 **Glycoprotein-glycoprotein receptor binding detection using bioluminescence resonance**  
2 **energy transfer (BRET)**

3 Kamila Adamczuk<sup>1</sup>, Adolfo Rivero-Müller<sup>1§</sup>

4 <sup>1</sup> Department of Biochemistry and Molecular Biology, Medical University of Lublin, Lublin, Poland

5 ORCIDs:

6 0000-0001-8892-1290

7 0000-0002-9794-802X

8

9 <sup>§</sup> Correspondence:

10 Department of Biochemistry and Molecular Biology, Medical University of Lublin, ul. Chodzki 1, 20-093, Lublin,  
11 Poland

12 [a.rivero@umlub.pl](mailto:a.rivero@umlub.pl)

13

14 **Abstract:** The glycoprotein receptors, members of the large G protein-coupled receptors (GPCRs)  
15 family, are characterized by a large extracellular domains responsible of binding their glycoprotein  
16 hormones. Hormone-receptor interactions are traditionally analyzed by ligand-binding assays most often  
17 using radiolabeling but also by thermal shift assays. However, the use of radioisotopes requires  
18 appropriate laboratory conditions, and moreover, for this purpose, purified cell membranes are most  
19 often used instead of living cells. This in turn poses another challenge due to the altered stability of  
20 membrane proteins in detergents used for purification. Here, we overcome such limitations by applying  
21 bioluminescence resonance energy transfer (BRET) in living cells to determine hormone-receptor  
22 interactions between a *Gaussia* luciferase (Gluc) luteinizing hormone/chorionic gonadotropin receptor  
23 (LHCGR) fusion and its ligands (yoked human chorionic gonadotropin (yhCG) or luteinizing hormone

24 (LH)) fused to the enhanced green fluorescent protein (eGFP). We first show that the Gluc-LHCGR is  
25 expressed on the plasma membrane and is fully functional, as well as the chimeric eGFP-hormones that  
26 are properly secreted and able to bind and activate the WT LHCGR. Finally, we applied the method to  
27 determine the interactions between clinically relevant mutations in the hormone as well as the receptor  
28 and show that this assay is fast and effective, plus safer and cost efficient alternative to radioligand-  
29 based assays, to screen for mutations in either the receptor or ligand. It enables kinetic measurements in  
30 living cells, detection of biosynthesis of the receptor (membrane expression) and it is compatible with  
31 downstream cellular assays - including firefly luciferase-based readouts.

32 **Keywords:** ligand-binding assay, bioluminescence resonance energy transfer (BRET), G protein-  
33 coupled receptors (GPCR), luteinizing hormone/chorionic gonadotropin receptor (LHCGR), *Gaussia*  
34 luciferase (Gluc), enhanced Green Fluorescent Protein (eGFP), glycoproteins, mutations.

## 35 **Introduction**

36 G protein-coupled receptors (GPCRs) are the most numerous group of membrane receptors responsible  
37 for the transduction of extracellular signals into the cell in response to external stimuli in the form of  
38 neurotransmitters, hormones, growth factors or light <sup>1</sup>. They are distinguished by the presence of a seven  
39  $\alpha$ -helix transmembrane domain connected by three extracellular and three intracellular loops. Due to the  
40 number and wide variety of receptors belonging to this family, they play key roles in physiological  
41 processes, including the nervous, endocrine, reproductive and cardiovascular systems <sup>2</sup>. Therefore, they  
42 are the target of around 30% of commercial drugs <sup>3</sup>. GPCRs include receptors for glycoprotein hormones  
43 among which is the luteinizing hormone/chorionic gonadotropin receptor (LHCGR), involved in the  
44 development of secondary sexual characteristics and synthesis of progesterone in females and  
45 testosterone in males <sup>4</sup>. Due to the occurrence of polymorphisms and mutations in the genes encoding  
46 both the LHCGR and its ligands, it is important to understand the impact of these alterations on the  
47 receptor-ligand functions.

48 Radioligand-binding assays have traditionally been the basic tools for studying the interactions between  
49 ligands (or agonist/antagonists) and GPCRs, which is of particular importance for the development of

50 the pharmaceutical industry. These assays are based on the incubation of radioligand with membranes  
51 from cells, or very rarely whole cells, expressing the GPCR of interest followed by the measurement of  
52 radioactivity bound ligand <sup>5</sup>. Hitherto, the most frequently used radiolabeled ligands for this purpose are  
53 <sup>3</sup>H- and <sup>125</sup>I-labeled ligands <sup>6</sup>. The utility of assays based on radiolabeling is mainly due to their high  
54 sensitivity and the fact that radioisotopes only slightly modify the chemical structure of the ligand.  
55 Nonetheless, the major disadvantage of radioligand-binding assay is that the preparation of labeled  
56 ligands is hazardous<sup>7</sup>. Therefore, the radioligand-based assays require specific laboratory conditions and  
57 they are associated with the production of radioactive waste. Furthermore, some of the radioisotopes are  
58 characterized by their short half-lives <sup>6</sup>. Radioligand binding assay is one of the endpoint assays, that  
59 measures receptor bound vs. unbound radio-ligand, usually on purified membranes, what precludes  
60 analyzing the kinetics of their interactions in living cells. Moreover, the use of membranes, often  
61 including the endoplasmic reticulum and Golgi apparatus, prevaricates obtaining information on the  
62 subcellular localization and activation of the receptor. Ligand-receptor interactions are also commonly  
63 analyzed using the thermal shift assay, which measures the thermal stability of the purified receptor in  
64 the presence and absence of ligand <sup>8</sup>.

65 Due to the above-mentioned issues, assays using non-radioactive labels and living cells are sought after.  
66 In this case, it is important to ensure that the label (or tag) does not affect the ligand affinity to the  
67 receptor and does not disturb the interaction between the receptor and the ligand<sup>9</sup>. The most commonly  
68 used nonradioactive bioassays are based on the fluorescence resonance energy transfer (FRET) and  
69 bioluminescence resonance energy transfer (BRET) phenomena. In the case of FRET, two  
70 chromophores are used, one of which is excited resulting in energy transfer and excitation of the second  
71 chromophore and thus its fluorescence emission <sup>10</sup>. FRET is detected by the change of fluorescent ratio  
72 between the donor and the acceptor, which equals to large background to noise ratio and variability, thus  
73 the need of measuring single cells <sup>11,12</sup>, instead of populations, this is labor-intensive and time-  
74 consuming. In the case of the BRET, one fluorescent protein is used as an acceptor, while a  
75 bioluminescent enzyme acts as a donor. As a result of enzymatic oxidation of a substrate, the energy is  
76 released and transferred to the fluorescent acceptor. A necessary condition for both of these phenomena

77 to occur is a small distance of <10nm (<100Å) between the donor and the acceptor enabling energy  
78 transfer<sup>13</sup>. The BRET method differs from the FRET method in that it does not require excitation with  
79 a light source, nevertheless it requires the use of a substrate suitable for a chosen luciferase, thus it has  
80 lower background noise and variation.

81 To achieve BRET we engineered a novel donor:acceptor pair, this is the use of *Gaussia* luciferase (Gluc)  
82 and the enhanced green fluorescent protein (eGFP). The function of bioluminescent energy donor is  
83 performed by Gluc which is linked to the *N*-terminus of the LHCGR. Gluc is an enzyme naturally  
84 secreted by the copepod *Gaussia princeps*. It is responsible for the oxidative decarboxylation of  
85 coelenterazine without additional cofactors, resulting in the formation of coelenteramide and the  
86 emission of blue light (480nm)<sup>14,15</sup>. Gluc is also one of the smallest known luciferases with a mass of  
87 19.9 kDa and it is distinguished by the fact that the humanized form of Gluc generates an over 100-fold  
88 higher bioluminescent signal as compared to Firefly and Renilla luciferases<sup>16</sup>. In turn, the function of  
89 the fluorescent energy acceptor here is performed by eGFP fused to both of the LHCGR ligands: human  
90 chorionic gonadotropin (hCG) or luteinizing hormone beta subunit (LHβ). The eGFP is characterized  
91 by the presence of two substitutions consisting of Ser65Thr and Phe64Leu, resulting in 35-fold brighter  
92 fluorescence as compared to the wild-type (WT) GFP<sup>17,18</sup>. Most importantly, this fluorescent protein is  
93 excited at 488nm and thus it coincides with the emission peak of Gluc<sup>19</sup>.

94 Here, we report a BRET system to study the interaction between the LHCGR and both of its ligands –  
95 hCG and LH. Furthermore, we show that this method can be used to study clinically relevant mutations  
96 both in the ligand and the receptor. In order to achieve that, we generated the only previously-described  
97 mutation on common glycoprotein alpha subunit (CGA) - Glu80Ala<sup>20</sup>, as well as three mutations in the  
98 extracellular domain (ECD) of LHCGR: Cys131Arg<sup>21</sup> and Ile152Thr<sup>22</sup>, reported as binding-deficient,  
99 and Glu354Lys reported as binding-capable but signal-deficient<sup>23</sup>. The CGA subunit was selected due  
100 to the fact that it is the only one known mutation in the *CGA* gene reported so far. Most likely, the lack  
101 of other reports on mutations within this gene is due to the essential functions performed by CGA subunit  
102 - it is necessary for the formation and proper functioning of LH, follicle-stimulating hormone (FSH) and  
103 thyroid-stimulating hormone (TSH) as well as hCG, the latter is indispensable for implantation and

104 maintenance of pregnancy<sup>24</sup>. The CGA<sup>Glu80Ala</sup> mutation was found in a patient with malignant neoplasm.  
105 Hitherto, no functional assays have been performed to demonstrate the importance of this mutation, in  
106 conjunction with hCGB/LHB, for its ability to bind and activate LHCGR<sup>20,24</sup>.

## 107 **Materials and Methods**

### 108 **Cell culture and transfection**

109 All cell lines were cultured in Dulbecco's Modified Eagle medium (DMEM)/F12 (Gibco) containing  
110 10% fetal bovine serum (FBS), 100 µg/mL streptomycin and 100 IU/mL penicillin (Gibco) in CO<sub>2</sub>  
111 incubator at 37°C and 95% humidity. Human embryonic kidney (HEK293) cells were obtained from  
112 ATCC, whereas HEK293 cells stably expressing a luminescent cAMP GloSensor (GS-293) (Promega)  
113 were previously created in our lab<sup>25</sup>. Another cell line that has been used in this study is the GS-293  
114 line stably transfected with the plasmid encoding the LHCGR and referred to as GS-LHCGR cell line<sup>26</sup>.  
115 Transfections were performed using the Turbofect Transfection Reagent (ThermoFisher Scientific  
116 #R0531) according to the manufacturer's protocol at 70-80% cell confluence.

### 117 **Molecular cloning**

118 The plasmids used as templates for further cloning were yhCG, NLS-AmCyan-P2A-LHB<sup>WT</sup>-mCherry  
119 and LHCGR<sup>WT</sup>-P2A-mCherry, whereas mCherry-TOPO and pUC18 plasmids were used as negative  
120 mock transfection controls. The eGFP sequence derived from eGFP-NPM WT Addgene (Plasmid  
121 #17578) was cloned into the yhCG (a gift from Prema Narayan<sup>27</sup>) vector at the carboxyl terminus, from  
122 here onwards referred to as yhCG<sup>WT</sup>-eGFP. In the case of the second ligand, the procedure was  
123 analogous and the eGFP coding sequence was introduced at the carboxyl terminus of the LHβ subunit<sup>26</sup>.  
124 Furthermore, the NLS-AmCyan part was removed from the construct which was then named LHB<sup>WT</sup>-  
125 eGFP.

126 In turn, for the donor the sequence encoding Gluc derived from pCMV-*Gaussia* Luc Vector  
127 (ThermoFisher Scientific #16147) was introduced at the *N*-terminus. Several variants of Gluc-LHCGR  
128 differing in length of flexible domain as well as the presence of Gluc signal peptide or the presence of  
129 mCherry coding sequence were created. Gluc-LHCGRv1 is distinguished by the presence of Gluc signal

130 peptide between the LHCGR signal peptide and LHCGR coding sequence as well as the presence of a  
131 linker composed of 10 amino acids (GGSGGGGSGG) between the sequences for Gluc and LHCGR.  
132 Similarly, Gluc-LHCGRv2 also contains a flexible domain built of 10 amino acids (GGSGGGGSGG),  
133 whereas the coding sequence for Gluc signal peptide was removed. The flexible domains of Gluc-  
134 LHCGRv3 and Gluc-LHCGRv4 are composed of 5 amino acids (GGGGS), nonetheless in the case of  
135 the latter, the mCherry coding sequence was also removed.

136 All cloning aside from the mCherry and NLS-AmCyan removal were performed using the Gibson  
137 Assembly. For this purpose, a linear vector and DNA insert with overlapping ends were obtained, which  
138 were then mixed together with Gibson Assembly Master Mix - Assembly (NEB #E2611) and incubated  
139 at 50°C for 15 minutes. Subsequent steps involve transformation of the obtained products into *E.coli*  
140 cells, purification of plasmids and their verification by Sanger sequencing (Genomed). On the contrary,  
141 mCherry and NLS-AmCyan sequences were removed from constructs using REPLACR-mutagenesis<sup>28</sup>.  
142 The plasmids reported in this work can be obtained via Addgene  
143 [https://www.addgene.org/Adolfo\\_Rivero-Muller/](https://www.addgene.org/Adolfo_Rivero-Muller/).

#### 144 **Flow cytometry**

145 HEK293 cells were seeded in 12-well plates in DMEM/F12 medium. On the following day, cells were  
146 transiently transfected with plasmids encoding either the wild-type LHCGR<sup>WT</sup>-P2A-mCherry or Gluc-  
147 LHCGR<sup>WT</sup> clones. Furthermore, mCherry-TOPO plasmid was used as an additional control for  
148 transfection efficiency, while pUC18 plasmid was used as mock transfected negative control. 48 hours  
149 after transfection, cells were incubated first with primary antibody referred to as rabbit anti-HA tag  
150 antibody (Cell Signaling #3724S) at 37°C for 1h and subsequently with donkey anti-rabbit IgG (H+L)  
151 Highly Cross-Adsorbed Secondary AntibodyAlexa-647 (ThermoFisher Scientific #A-31573) at 37°C  
152 for 1h. The primary antibody was diluted in ratio 1:1600, whereas the secondary antibody was diluted  
153 in ratio 1:1000 and TBS containing 2% bovine serum albumin (BSA) was used for dilution. The  
154 fluorescence intensity at the cell surface was read using FACSCalibur flow cytometer (BD). Mean  
155 fluorescence intensity (MFI) was plotted to compare relative expression levels at the cell surface of  
156 LHCGR<sup>WT</sup>-P2A-mCherry and Gluc-LHCGR<sup>WT</sup> clones.

157 **Imaging of living cells**

158 HEK293 cells were seeded in 24-well imaging plate (MoBiTec #5231-20) and on the following day  
159 cells were transiently transfected with plasmids encoding the yhCG, yhCG<sup>WT</sup>-eGFP, NLS-AmCyan-  
160 P2A-LHB<sup>WT</sup>-mCherry and LHB<sup>WT</sup>-eGFP. In the case of plasmids encoding the LH $\beta$  subunit, cells were  
161 transfected either alone or co-transfected with CGA to generate a functional LH composed of both  
162 subunits. The mCherry-TOPO plasmid was used as negative mock transfected control and transfection  
163 efficiency control as previously. 48 hours upon transfection, cells were imaged using A1 Nikon Eclipse  
164 Ti confocal microscope with 640 nm laser.

165 **cAMP analysis**

166 LHCGR activation was detected by cAMP generation using the GS-293 cell line, which was seeded in  
167 96-well plates. On the next day, cells were transiently transfected with either the LHCGR<sup>WT</sup>-P2A-  
168 mCherry or Gluc-LHCGR<sup>WT</sup> plasmids. 48h post transfection, DMEM-F12 medium was replaced with  
169 assay medium, which consisted of DMEM-F12 and CO<sub>2</sub>-independent medium (Gibco #18045088) in  
170 ratio 1:1. The assay medium was supplemented with 2% GloSensor Reagent (Promega #E1291) and  
171 0.1% BSA. The following step was the equilibration of cells in assay medium for 1 hour at room  
172 temperature. Afterwards, the measurement of baseline luminescence was made for 15 min which was  
173 followed by the stimulation of GS-293 cell line with recombinant hCG (rec-hCG) or recombinant LH  
174 (rec-LH). cAMP production was measured as a luminescent readout with the use of Tecan M200Pro  
175 microplate reader. The second part of the experiment involved the use of GS-LHCGR cell line  
176 distinguished by stable expression of the LHCGR receptor. GS-LHCGR cells were seeded in 96-well  
177 plate, while at the same time HEK293 cells were seeded in 6-well plates. On the following day, HEK293  
178 cells were transiently transfected with yhCG<sup>WT</sup>, yhCG<sup>WT</sup>-eGFP, NLS-AmCyan-P2A-LHB<sup>WT</sup>-mCherry  
179 and LHB<sup>WT</sup>-eGFP. In the case of plasmids encoding the LH $\beta$  subunit, cells were transfected either alone  
180 or co-transfected with a plasmid encoding CGA. 36 hours upon transfection DMEM-F12 medium was  
181 replaced with fresh cell culture medium. 48 hours post transfection, the cell culture medium from 6-well  
182 plates was collected and either concentrated with Amicon Ultra microconcentrator 10 kDa cut-off  
183 (Merck Millipore #UFC501096) or not. Meanwhile, DMEM-F12 medium in 96-well plates was

184 replaced with assay medium, the cells were transferred to the microplate reader and incubated in assay  
185 medium for 1 hour at room temperature. Afterwards, the measurement of baseline luminescence was  
186 made as described above and both concentrated and non-concentrated media were used to stimulate GS-  
187 LHCGR cells. Activation of LHCGR was measured as described above.

### 188 **Fluorescence and luminescence measurements**

189 Next step of the study was the fluorescence measurement of the collected and concentrated medium  
190 containing secreted hormones (yhCG, yhCG<sup>WT</sup>-eGFP, NLS-AmCyan-P2A-LHB<sup>WT</sup>-mCherry/CGA and  
191 LHB<sup>WT</sup>-eGFP/CGA). 36 hours upon transfection DMEM-F12 medium was replaced with fresh  
192 DMEM/F-12 medium without phenol red (Gibco #21041025). 48 hours post transfection, the cell culture  
193 medium from 6-well plate was collected and either concentrated with Amicon Ultra microconcentrator  
194 10 kDa cut-off (Merck Millipore #UFC501096) or not. Afterwards, fluorescence top reading was  
195 performed (exc. 488 nm, em. 509 nm). Furthermore, the luminescence measurement of medium  
196 collected from cells transfected with either the LHCGR<sup>WT</sup>-P2A-mCherry or Gluc-LHCGR<sup>WT</sup> plasmids  
197 was performed. Both luminescence and fluorescence measurements were read using Tecan M200Pro  
198 microplate reader.

### 199 **Equalization of eGFP-fused hormones**

200 To normalize the concentration of eGFP-coupled hormones secreted into the cell culture medium, the  
201 GloSensor Assay was performed using the GS-LHCGR cell line. First, HEK293 cells were seeded in 6-  
202 well plates, whereas GS-LHCGR cells were seeded in 96-well plates. At 70% confluency, HEK293 cells  
203 were transfected with plasmids encoding either yhCG<sup>WT</sup>, yhCG<sup>WT</sup>-eGFP or TOPO-mCherry as mock  
204 transfected control. Furthermore, cells were cotransfected using either NLS-AmCyan-P2A-LHB<sup>WT</sup>-  
205 mCherry and CGA or LHB<sup>WT</sup>-eGFP and CGA plasmids. 36 hours upon transfection cell culture medium  
206 in 6-well plates was replaced with fresh medium. 48 hours post transfection, the cell culture medium  
207 from 6-well plate was collected and equalized by fluorescence, using Amicon Ultra microconcentrator  
208 10 kDa cut-off. Meanwhile, 11 different dilutions were prepared for both recombinant hormones - hCG  
209 and LH. Then, DMEM-F12 medium of the 96-well plates was replaced with assay medium, the cells  
210 were transferred to the microplate reader and incubated in assay medium for 1 hour at room temperature.



211 Afterwards, the measurement of baseline luminescence was made and GS-LHCGR cells were stimulated  
212 with either concentrated or non-concentrated cell culture medium as well as using different dilutions of  
213 recombinant hormones. Activation of LHCGR was measured as described above.

#### 214 **BRET assay**

215 HEK293 cells were seeded in 96-well plates and 6-well plates and on the following day cells were  
216 transiently transfected. In the case of 96-well plates, cells were transfected with either the WT LHCGR-  
217 P2A-mCherry or Gluc-LHCGRv4, whereas the other plate was transfected with either the WT yhCG<sup>WT</sup>,  
218 yhCG<sup>WT</sup>-eGFP or cotransfected with either NLS-AmCyan-P2A-LHB<sup>WT</sup>-mCherry and CGA or LHB<sup>WT</sup>-  
219 eGFP and CGA plasmids. 36 hours upon transfection DMEM-F12 medium in 6-well plates was replaced  
220 with fresh DMEM/F-12 medium without phenol red (Gibco #21041025). 48 hours post transfection, the  
221 cell culture medium was collected and concentrated as previously. Meanwhile, HEK293 cells in 96-well  
222 plates were washed with DPBS, then concentrated hormones were added to the wells and cells were  
223 incubated with hormones for 20 minutes at room temperature. After incubation, cells were washed twice  
224 with DPBS, then DPBS and coelenterazine (Promega #S2001) were added to the wells at a final  
225 concentration of 20  $\mu$ M. Thereafter, the measurement of luminescence and fluorescence top reading  
226 (exc. 230 nm, em. 509 nm) were performed using Tecan M200Pro microplate reader.

#### 227 **Application of ligand-binding assay based on BRET to investigate the CGA subunit mutation** 228 **and LHCGR binding-deficient mutations**

229 In order to demonstrate the functionality of the method described in this study, a two-part experiment  
230 was performed. First part of the experiment was carried out to assess whether the mutant hCG is able to  
231 bind and activate the LHCGR. To prepare the vector coding for yhCG<sup>Glu80Ala</sup>-eGFP, REPLACR  
232 mutagenesis was performed as described by Trehan et al<sup>28</sup>. Initially, GS-LHCGR cells were seeded in  
233 96-well plates, while HEK293 cells were seeded in 6-well plates. On the following day, HEK293 cells  
234 were transiently transfected with either the yhCG<sup>WT</sup>-eGFP or yhCG<sup>Glu80Ala</sup>-eGFP plasmids. 48 hours  
235 after transfection, the cAMP measurement was carried out as described above. The next step was the  
236 imaging of living cells. For this purpose, HEK293 cells were seeded in 24-well imaging plate and on  
237 the following day cells were transiently transfected with plasmids encoding either the yhCG<sup>WT</sup>-eGFP or

238 yhCG<sup>Glu80Ala</sup>-eGFP plasmids. 48 hours after transfection, cells were imaged as previously. BRET was  
239 analyzed as following: HEK293 cells were seeded in 96-well plates and 6-well plates. On the following  
240 day, cells seeded in 96-well plates were transiently transfected with Gluc-LHCGR<sup>WT</sup>, whereas the cells  
241 seeded in 6-well plates were transfected with either yhCG<sup>WT</sup>-eGFP or yhCG<sup>Glu80Ala</sup>-eGFP. 36 hours later,  
242 medium from 6-well plates was replaced with fresh DMEM-F-12 medium without phenol red and 48  
243 hours upon transfection, the cell culture medium was collected and concentrated as above. Then, the  
244 BRET experiment was performed as described in the BRET assay section.

245 The second part of the experiment was carried out to assess the effect of Cys131Arg, Ile152Thr and  
246 Glu354Lys LHCGR mutants on their ability to bind ligand and transduce signal. REPLACR  
247 mutagenesis was performed as described before<sup>28</sup>. As a result, we obtained plasmids referred to as Gluc-  
248 LHCGR<sup>Cys131Arg</sup>, Gluc-LHCGR<sup>Ile152Thr</sup> and Gluc-LHCGR<sup>Glu354Lys</sup>. Then, the membrane expression of the  
249 resulting constructs was assessed by flow cytometry. For this purpose, HEK293 cells were seeded in  
250 12-well plates in DMEM/F12 medium and on the next day they were transiently transfected with  
251 plasmids encoding either Gluc-LHCGR<sup>WT</sup> or mutant receptors. 48 hours after transfection, the flow  
252 cytometry analysis was performed as described above.

### 253 **Sequential measurements of ligand-receptor (BRET) interactions and receptor activity**

254 GS-293 cells were seeded in 96-well plate, whereas HEK293 cells were seeded in 6-well plate. On the  
255 following day, GS-293 cells were transiently transfected with either the LHCGR<sup>WT</sup>-P2A-mCherry or  
256 Gluc-LHCGR<sup>WT</sup> plasmids, while HEK293 cells were transfected with either the LHB<sup>WT</sup>-eGFP/CGA or  
257 NLS-AmCyan-P2A-LHB<sup>WT</sup>-mCherry/CGA plasmids. 36 hours later, medium from 6-well plate was  
258 replaced with fresh DMEM/F-12 medium without phenol red and 48 hours upon transfection, the cell  
259 culture medium was collected and concentrated as above. 48h post transfection, HEK293 cells were  
260 equilibrated in GloSensor assay medium for 1 hour at room temperature, then the measurement of  
261 baseline of Firefly luciferase (FFluc) luminescence (cAMP) was made for 15 minutes, followed by  
262 stimulation with LHB<sup>WT</sup>-eGFP/CGA. Then a readout was performed for another 45 minutes in a plate  
263 reader. After completion, cells were incubated for 1 hour before addition of hormones, wash twice with  
264 DPBS, and addition of coelenterazine, followed by the measurement of luminescence and fluorescence.

## 265 **Statistical analysis**

266 GraphPad Prism 9 software (Graph Pad Software, San Diego, CA, USA) was used for statistical analysis  
267 using one-way ANOVA.

## 268 **Results**

269 A representation of the of the constructs (**Figure 1A**) and the principle - where BRET is used  
270 to detect the interaction (binding) of the ligand, either LH or hCG, tagged with eGFP, and the  
271 LHCGR, fused with Gluc (**Figure 1B**). Several different architectures were used to ensure the  
272 proper biosynthesis, localization and functionality of both the ligands and the receptor.

### 273 **Membrane expression of the receptor**

274 The first stage of the study was to assess the membrane expression of Gluc-LHCGR with different  
275 architectures using flow cytometry. While the majority of Gluc-LHCGR clones resulted in no membrane  
276 expression, Gluc-LHCGRv4 was distinguished by a high membrane expression (**Figure 2A**), which was  
277 1.23-fold higher than that the wild-type (WT) LHCGR.

### 278 **Gluc functionality**

279 To ensure that Gluc was in fact fused to the LHCGR on the membrane, as sometimes fused proteins  
280 might be cleaved by endogenous or exogenous proteases<sup>29</sup>, we then analyzed the luminescence on cells  
281 and in the medium. As shown in **Figure 2B**, Gluc activity was virtually only in the cellular fraction,  
282 whereas in the medium only an insignificant fraction of luminescence could be detected, likely from  
283 dead cells. Once we ensured that Gluc-LHCGR<sup>WT</sup> was fully functional, we moved to analyze the ligands  
284 that will be used in BRET.

### 285 **Receptor activation**

286 To ensure that the fusion to Gluc does not block the functionality of the chimeric LHCGR, we then  
287 determined their responsiveness to both hormones (rec-LH and rec-hCG) by measuring cAMP  
288 production. Stimulation of Gluc-LHCGRv4 with rec-hCG resulted in cAMP production comparable to  
289 that of the WT receptor, whereas stimulation of other Gluc-LHCGR architectures (v1, v2, v3) resulted

290 in negligible cAMP production upon receptor stimulation (**Figure 2C**). Similar results were observed  
291 for cells expressing Gluc-LHCGR stimulated with rec-LH (**Figure 2D**).

### 292 **Biosynthesis of the hormone-eGFP fusions**

293 We then look into the eGFP-fused hormones. The cellular localization of the eGFP-tagged hormones  
294 was assessed by confocal microscopy. In all cases, the receptor proteins were not dispersed in the  
295 cytoplasm, but they were visible in secretion trafficking route (**Figure 3A**), as we have previously  
296 reported<sup>26</sup>.

### 297 **Measurement of fluorescence and receptor activation with hormone-eGFP**

298 To ensure that eGFP-fused hormones were secreted and able to activate their cognate receptor, we  
299 collected the media and analysed both fluorescence and by their ability to activate the WT LHCGR. We  
300 first analyzed if the chimeric hormones were properly secreted, to do this we measured eGFP  
301 fluorescence in medium collected from cells transfected with either yhCG<sup>WT</sup>, yhCG<sup>WT</sup>-eGFP, LHB<sup>WT</sup>-  
302 eGFP/CGA or mock plasmids, showing that the fluorescence in medium from yhCG<sup>WT</sup>-eGFP and LH<sup>WT</sup>-  
303 eGFP secreting cells was significantly higher than that of yhCG<sup>WT</sup> to mock transfected cells (**Figure**  
304 **3B**). A clear difference in fluorescence between yhCG<sup>WT</sup>-eGFP and LH<sup>WT</sup>-eGFP could be noted,  
305 whereas the levels of LH<sup>WT</sup>-eGFP was less than yhCG<sup>WT</sup>-eGFP

306 We then tested whether the eGFP-tagged hormones retained their ability to stimulate the LHCGR. The  
307 concentration of hormone was equalized taking advantage of eGFP. In **Figure 3C** only the  
308 concentrations of the recombinant hormones which caused LHCGR activation to a level comparable to  
309 the activation caused by the use of either concentrated or non-concentrated WT or eGFP-coupled  
310 hormones are shown. The use of concentrated WT yhCG resulted in LHCGR activation comparable to  
311 that induced by the use of rec-hCG at concentration of 250ng/μl. In turn, the use of non-concentrated  
312 cell culture medium resulted in activation at a level comparable to that of rec-hCG at 50ng/μl, as well  
313 as for the concentrated yhCG-eGFP (**Figure 3C**). When using concentrated medium collected from cells  
314 co-transfected with NLS-AmCyan-P2A-LHB<sup>WT</sup>-mCherry and CGA, LHCGR activation was  
315 comparable to that observed for rec-LH at concentration of 50ng/μl. The stimulation with non-  
316 concentrated medium resulted in LHCGR activation comparable to that obtained for the rec-LH

317 concentration of 10ng/ $\mu$ l. In the case of cells co-transfected with LHB-eGFP and CGA, the use of  
318 concentrated eGFP-fused LH resulted in receptor activation similar to that observed for rec-LH at  
319 concentration of 20ng/ $\mu$ l, while the use of non-concentrated eGFP-fused LH was too low to be measured  
320 (**Figure 3D**).

### 321 **BRET assay**

322 Knowingly that the chimeric hormone (acceptor) and the donor Gluc-LHCGR function just as their WT  
323 counterparts, we further analyzed their interactions using BRET. The ratio between acceptor and donor  
324 emissions calculated for LHCGR stimulated with WT yhCG is comparable to the ratio obtained for the  
325 receptor stimulated with hormone-free medium.

326 By contrast, the acceptor:donor ratio calculated for cells expressing Gluc-LHCGR and stimulated with  
327 eGFP-fused yhCG is 2.9-fold higher as compared to the ratio of cells stimulated with WT yhCG (**Figure**  
328 **4A**). In the case of LHCGR stimulation with eGFP-fused LH, the calculated ratio between the acceptor  
329 and donor was 3.4-fold higher than that calculated for the stimulation with NLS-AmCyan-P2A-LHB<sup>WT</sup>-  
330 mCherry/CGA which was negligible and comparable to the hormone-free medium (**Figure 4B**).

### 331 **Application of ligand-binding assay based on BRET**

332 As described in the materials and methods section, a two-part experiment was performed to demonstrate  
333 the functionality of the ligand-binding assay. We selected the yhCG<sup>Glu80Ala</sup> mutant, previously reported  
334 as yhCG<sup>Glu56Ala</sup>, to test our assay. At first, we noticed that the secretion of yhCG<sup>Glu80Ala</sup>-eGFP was lower  
335 than yhCG(WT)-eGFP, and thus, taking advantage of the eGFP, determine the cellular localization of  
336 mutant yhCG-eGFP using confocal microscope. Cellular imaging showed that secretion of mutant  
337 hormone was significantly reduced as compared to the yhCG-eGFP expression (**Figure 5A**).

338 Then, we performed GloSensor Assay using equalized hormone concentrations which revealed 7.3-fold  
339 less cAMP production after yhCG<sup>Glu80Ala</sup>-eGFP stimulation as compared to yhCG<sup>WT</sup>-eGFP (**Figure 5B**).

340 Afterwards, BRET was performed using equalized hormone concentrations to demonstrate the  
341 interaction between the mutant ligand and LHCGR. The conducted experiment revealed that in the case

342 of using a medium containing yhCG<sup>Glu80Ala</sup>-eGFP, the acceptor:donor ratio was 4.6-fold lower as  
343 compared to the BRET ratio calculated for the equimolar yhCG<sup>WT</sup>-eGFP moiety (**Figure 5C**).

344 Since hormone binding depends in both the hormone and the receptor, we then selected two mutations  
345 in the ECD of the LHCGR that have been previously described as a binding-deficient - Cys131Arg and  
346 Ile152Thr<sup>21,22</sup> and one able to bind but unable to signal - Glu354Lys<sup>23</sup>. First, we tested whether these  
347 mutant receptors fused with Gluc, were then expressed on the plasma membrane by flow cytometry  
348 (**Figure 6A**)

349 Once we knew that the mutant receptors are localized on the membrane, we tested if they are being  
350 activated by stimulation with either rec-LH or rec-yhCG and whether they bind to eGFP-fused ligands  
351 (**Figure 6B**).

352 As presented in **Figure 6**, all tested LHCGR mutants were activated as a result of stimulation with either  
353 rec-hCG (**Figure 6B**) or rec-LH (**Figure 6C**). Nevertheless, in the case of Gluc-LHCGR<sup>Cys131Arg</sup> and  
354 Gluc-LHCGR<sup>Ile152Thr</sup>, several fold lower cAMP production was observed as compared to Gluc-  
355 LHCGR<sup>WT</sup>, whereas Gluc-LHCGR<sup>Glu354Lys</sup> was distinguished by the lowest cAMP production. In turn,  
356 the BRET assay analysis (**Figures 6D and 6E**) revealed that the acceptor:donor ratios calculated for  
357 Gluc-LHCGR<sup>Cys131Arg</sup> and Gluc-LHCGR<sup>Ile152Thr</sup> were approximately 5-fold lower as compared to the  
358 ratio calculated for Gluc-LHCGR<sup>WT</sup>. On the contrary, the BRET ratio obtained for Gluc-LHCGR<sup>Glu354Lys</sup>  
359 was 2.6- and 1.8-fold lower when stimulated with rec-hCG (**Figure 6D**) and rec-LH (**Figure 6E**),  
360 respectively as compared to Gluc-LHCGR<sup>WT</sup>. These results corroborate previous reports reporting that  
361 the decreased activation of LHCGR<sup>Cys131Arg</sup> and LHCGR<sup>Ile152Thr</sup> results from their decreased ability to  
362 bind the hormone and not from decreased expression on the plasma membrane. By contrast, the BRET  
363 values calculated for Gluc-LHCGR<sup>Glu354Lys</sup> indicate that the decreased production of cAMP due to ligand  
364 stimulation is mainly due to decreased membrane expression of this receptor and its intracellular  
365 retention. In this case, the decrease in membrane expression of receptor correlates with a decreased  
366 BRET ratio. The obtained results are consistent with earlier reports on the above-mentioned mutations  
367 and confirm their influence on the LHCGR binding and signaling.

368 Finally, we tested whether our BRET (ligand:receptor binding) bioassay could be coupled to the cAMP  
369 (receptor activation) assay in the same samples, since the luminescence from Gluc and that of firefly  
370 luciferase (FFluc) are significantly different in light spectra as well as they require the use of different  
371 substrates<sup>14,29</sup>. Since the readout of Gluc is immediate upon addition, while the cAMP GloSensor  
372 requires time stabilize and accumulate in cells, the assays were performed sequentially (**Figure 7A**).  
373 The charts in Figure 7 show that cAMP (GloSensor) (**Figure 7B**) and BRET (**Figure 7C**) could be  
374 analyzed in the very same cells in a sequential manner.

375

## 376 **Discussion**

377 The methods used so far to study the interactions between ligands and their receptors were mainly based  
378 on the use of a radioisotope-labeled ligand associated with the need to ensure appropriate conditions in  
379 the laboratory and safety protocols. Usually such assays involve the use of isolated cell membranes<sup>31–33</sup>  
380 and competition is “cold” hormone to show specificity. Furthermore, it generates a significant cost of  
381 research resulting from the need to dispose of radioactivity waste. We depart from the traditional  
382 labeling of ligand with a radioisotope, replacing it with a fluorescent protein. Nevertheless, the mere  
383 replacement of the radioisotope with a fluorescent protein has already been used in FRET-based  
384 methods, where a second fusion protein consisting of an appropriate receptor and a second fluorescent  
385 protein is used<sup>11</sup>. The use of FRET-based methods is distinguished by many advantages, such as high  
386 spatial and temporal resolution, but their application is associated with certain limitations due to the  
387 necessity to use an external light source to excite the donor protein. This in turn generates a high  
388 background, thus lower signal-to-noise ratio, and high heterogeneity between cells/samples.  
389 Furthermore, other significant disadvantages of FRET application in study of protein-protein  
390 interactions are donor photobleaching, which results in signal decrease over time, as well as the  
391 phenomenon of spectral overlap which leads to the bleed-through requiring subsequent corrections<sup>34</sup>.  
392 In this research, the BRET phenomenon was applied in ligand-binding assay in which luciferase  
393 catalyzes the oxidation of the substrate and its conversion to its derivative, resulting in the emission of  
394 a photon. For this purpose an acceptor fusion protein was designed and created, in which the

395 extracellular domain of the LHCGR was fused not with a fluorescent protein, but with *Gaussia* luciferase  
396 (Gluc). Therefore, the BRET method is distinguished by the lack of background noise and thus higher  
397 sensitivity as compared to the FRET-based assay<sup>35</sup>. Additionally, due to the fact that this method does  
398 not require excitement with an external light source, it constitutes a more accessible alternative to the  
399 FRET-based method due to simpler instrumentation requirements<sup>36</sup>. Another advantage of BRET  
400 method application in the study of protein-protein interaction is the constant photon emission which  
401 enables the performance of studies over time. Furthermore, in contrast to the FRET, there is no false  
402 excitation or bleed-through phenomenon.

403 Hitherto, the BRET phenomenon has been used mainly to study the interactions between the GPCRs  
404 and to determine whether receptors form dimers or oligomers<sup>37,38</sup>. The application of the BRET  
405 phenomenon in the study of receptor-ligand interactions may be of great biological importance in studies  
406 focused on binding of LHCGR with its corresponding ligands - hCG and LH. This method may  
407 constitute a useful tool for molecular characterization of novel and already identified mutations in the  
408 genes encoding both hormones' subunits as well as their receptor.

409 The LHCGR is an extremely important constituent for the proper functioning of female and male  
410 reproductive systems through stimulation of ovulation in women and induction of testosterone  
411 production in men. Although mutations in the *LHCGR* gene are extremely rare they can have a huge  
412 impact on the sexual development and fertility of the patients affected by mutations<sup>39,40</sup>. Their discovery  
413 and subsequent examination gives a better insight into the importance of LHCGR for human  
414 reproduction as well as they expand the current state of knowledge about the entire family of GPCRs.  
415 Mutations in genes encoding hormone-specific subunits are even more rare and only cases of  
416 inactivating mutations in these genes have been identified. Nonetheless, similarly to the mutations  
417 affecting *LHCGR* gene, these mutations are associated with a wide range of symptoms such as delayed  
418 puberty, hypogonadotropic hypogonadism and infertility in men as well as secondary amenorrhea and  
419 infertility in women<sup>4</sup>. Most often, aforementioned mutations result in impaired biosynthesis, abnormal  
420 posttranslational modification, incorrect heterodimerization with common subunit, impaired secretion



421 of the hormone and its binding with receptor<sup>41</sup>. Moreover, we show that binding- and activation-assays  
422 can be run on the same samples, what saves time and money, and generates data with enhanced kinetics.  
423 In summary, the BRET-based ligand-binding assay developed by us enables to investigate the effect of  
424 mutations identified in both the *LHCGR* gene as well as in genes encoding its ligands' subunits.  
425 Additionally, it is possible to apply this method in the study of mutations present in genes encoding  
426 other GPCRs, and in particular glycoprotein receptors, and their ligands after appropriately introduced  
427 changes using genetic engineering. A significant advantage distinguishing this method is the use of live  
428 cells instead of isolated cell membranes. This in turn is associated with another advantage of the BRET-  
429 based method, which is the possibility of simultaneous use of two different luciferases - *Gaussia* and  
430 *Firefly*. This is possible due to the use of different substrates for these enzymes and due to their different  
431 emission spectra and thus the use of different filters set for the signal measurement. Therefore, it is  
432 possible to test ligand-binding using *Gaussia* luciferase as well as to investigate receptor activation and  
433 downstream signaling pathways using *Firefly* luciferase in the same cells. Simultaneous measurement  
434 of ligand-binding assay and receptor activation is possible, nonetheless limited by the possession of the  
435 appropriate equipment enabling the separation of the emission spectra for both luciferases and the  
436 fluorescent protein. Furthermore, another advantage of this BRET-based assay is the possibility to  
437 measure the membrane expression of LHCGR, or any other GPCR, by adding coelenterazine to the cells  
438 expressing the Gluc-fused receptor, followed by the luminescence readout. The level of observed  
439 luminescence correlates with the level of relative membrane expression of the GPCR under study as  
440 described by Rodríguez et al. on the example of Gluc fused to the extracellular part of the Cannabinoid  
441 receptor 1 (CB1)<sup>29</sup>.

442 To conclude, the method of studying the interaction between the glycoprotein and the glycoprotein  
443 receptor described by us is a simpler and faster alternative to the ligand-binding methods used so far, at  
444 the same time enabling the assessment of receptor membrane expression as well as the study of receptor  
445 activation using downstream signaling assays.

## 446 **Acknowledgements**

447 Authors would like to thank Addgene, and the colleagues for the support to the greater scientific  
448 community.

## 449 **Funding**

450 This work was supported by the Polish National Science Centre (NCN) grant: DEC-  
451 2018/29/N/NZ5/02670.

## 452 **Conflicts of Interest**

453 The authors declare no conflict of interest.

## 454 **References**

- 455 1. Zhang, R. & Xie, X. Tools for GPCR drug discovery. *Acta Pharmacol Sin* **33**, 372–84 (2012).
- 456 2. Vsevolod Katritch, Vadim Cherezov & R. C. S. Structure-function of the G protein-coupled  
457 receptor superfamily. *Annu Rev Pharmacol Toxicol* **53**, 531–556 (2013).
- 458 3. Sriram, K. & Insel, P. A. G protein-coupled receptors as targets for approved drugs: How many  
459 targets and how many drugs? *Molecular Pharmacology*. **93**, 251–258 (2018).
- 460 4. Szymańska, K., Kałafut, J. & Rivero-Müller, A. The gonadotropin system, lessons from animal  
461 models and clinical cases. *Minerva Ginecologica*. **70**, 561–587 (2018).
- 462 5. Toews, L. & David, B. Radioligand binding methods: practical guide and tips. *Am J Physiol* **265**,  
463 421–429 (1993).
- 464 6. Jong, L. A. A. De, Uges, D. R. A., Piet, J. & Bischoff, R. Receptor – ligand binding assays:  
465 Technologies and Applications. *Journal of chromatography B* 1–25 (2005).

- 466 7. Flanagan, C. A. GPCR-radioligand binding assays. *Biophysical Methods in Cell Biology*. **132**,  
467 191–215 (2016).
- 468 8. Huynh, K., Partch, C. L., Analysis of Protein Stability and Ligand Interactions by Thermal Shift  
469 Assay. *Curr Protoc Protein Sci*. **79**, 28.9.1-28.9.14 (2015).
- 470 9. Takeuchi, T., Nishikawa, T., Matsukawa, R. & Matsui, J. Nonisotopic Receptor Assay for  
471 Benzodiazepine Drugs Using Time-Resolved Fluorometry. *Anal. Chem.* **67**, 2655–2658 (1995).
- 472 10. Forster, T. Zwischenmolekulare Energiewanderung & Fluoreszenz. *Annalen der Physik*. **6**, 55–  
473 75 (1948).
- 474 11. Shrestha, D., Jenei, A., Nagy, P., Vereb, G. & Szöllösi, J. Understanding FRET as a research tool  
475 for cellular studies. *International Journal of Molecular Sciences*. **16**, 6718–6756 (2015).
- 476 12. Schuler, B. Single-molecule FRET of protein structure and dynamics - a primer. *J*  
477 *Nanobiotechnology* **11**, (2013).
- 478 13. Rivero-Müller, A., Jonas, K. C., Hanyaloglu, A. C. & Huhtaniemi, I. Di/Oligomerization of GPCRs  
479 - Mechanisms and functional significance. *Progress in Molecular Biology and Translational*  
480 *Science* **117**, 163–185 (2013).
- 481 14. Verhaegen, M. & Christopoulos, T. K. Purification and Analytical Application of a  
482 Bioluminescent Reporter for DNA Hybridization. *Anal. Chem.* **74**, 4378–4385 (2002).
- 483 15. Tannous, B. A., Kim, D., Fernandez, J. L., Weissleder, R. & Breakefield, X. O. Codon-Optimized  
484 Gaussia Luciferase cDNA for Mammalian Gene Expression in Culture and in Vivo. *Molecular*  
485 *Therapy* **11**, 435–443 (2005).
- 486 16. Remy, I. & Michnick, S. W. A highly sensitive protein-protein interaction assay based on  
487 Gaussia luciferase. *Nature Methods* **3**, 977–979 (2006).

- 488 17. Brendan P. Cormack, R. H. V. and S. F. FACS-optimized mutants of the green fluorescent  
489 protein (GFP). *Gene* **173**, 33–38 (1996).
- 490 18. Yang, T., Cheng, L. & Kain, S. R. Optimized codon usage and chromophore mutations provide  
491 enhanced sensitivity with the green fluorescent protein. *Nucleic Acids Research* **24**, 4592–  
492 4593 (1996).
- 493 19. Patterson, G. H., Knobel, S. M., Sharif, W. D., Kain, S. R. & Piston, D. W. Use of the Green  
494 Fluorescent Protein and Its Mutants in Quantitative Fluorescence Microscopy. *Biophysical*  
495 *Journal* **73**, 2782–2790 (1997).
- 496 20. Nishimura, R. *et al.* A single amino acid substitution in an ectopic alpha subunit of a human  
497 carcinoma choriogonadotropin. *The Journal of Biological Chemistry* **261**, 10475–10477 (1986).
- 498 21. Misrahi, M. *et al.* Comparison of immunocytochemical and molecular features with the  
499 phenotype in a case of incomplete male pseudohermaphroditism associated with a mutation  
500 of the luteinizing hormone receptor. *Journal of Clinical Endocrinology and Metabolism* **82**,  
501 2159–2165 (1997).
- 502 22. Qiao, J. *et al.* A splice site mutation combined with a novel missense mutation of LHCGR cause  
503 male pseudohermaphroditism. *Human Mutation* **30**, (2009).
- 504 23. Stavrou, S. S. *et al.* A novel mutation of the human luteinizing hormone receptor in 46XY and  
505 46XX sisters. *Journal of Clinical Endocrinology and Metabolism* **83**, 2091–2098 (1998).
- 506 24. Nishimura, R., Utsunomiya, T., Ide, K., Tanabe, K., Hamamoto, T., and Mochizuki, M. Free  
507 Alpha Subunits of Glycoprotein Hormone with Dissimilar Carbohydrates Produced by  
508 Pathologically Different Carcinomas. *Endocrinol. Japon.* **32**, 463–472 (1985).

- 509 25. Trehan, A., Rotgers, E., Coffey, E. T., Huhtaniemi, I. & Rivero- Müller, A. CANDLES, an assay for  
510 monitoring GPCR induced cAMP generation in cell cultures. *Cell Communication and Signaling*  
511 **12**, 1–17 (2014).
- 512 26. Potorac, I. *et al.* A vital region for human glycoprotein hormone trafficking revealed by an LHB  
513 mutation. *Journal of Endocrinology* **231**, 197–207 (2016).
- 514 27. Narayan, P., Gray, J. & Puett, D. Yoked complexes of human choriogonadotropin and the  
515 lutropin receptor: Evidence that monomeric individual subunits are inactive. *Molecular*  
516 *Endocrinology* **16**, 2733–2745 (2002).
- 517 28. Trehan, A. *et al.* REPLACR-mutagenesis, a one-step method for site-directed mutagenesis by  
518 recombineering. *Scientific Reports* **6**, 1–9 (2016).
- 519 29. Rodríguez-Rodríguez, I., Kalafut, J., Czerwonka, A. & Rivero-Müller, A. A novel bioassay for  
520 quantification of surface Cannabinoid receptor 1 expression. *Scientific Reports* **10**, (2020)
- 521 30. Gould, S. J., Subramani, S. Firefly luciferase as a tool in molecular and cell biology. *Anal*  
522 *Biochem.* **175(1)**, 5-13 (1988).
- 523 31. Bylund, D. B., Deupree, J. D. & Toews, M. L. Radioligand-Binding Methods for Membrane  
524 Preparations and Intact Cells. *Methods Mol Biol.* **259**, 1–28 (2004).
- 525 32. Hoare, S. R. J. & Usdin, T. B. Quantitative cell membrane-based radioligand binding assays for  
526 parathyroid hormone receptors. *J Pharmacol Toxicol.* **41**, (1999).
- 527 33. Rivero-Muller, A. *et al.* Rescue of defective G protein-coupled receptor function in vivo by  
528 intermolecular cooperation. *Proceedings of the National Academy of Sciences* **107**, 2319–2324  
529 (2010).

- 530 34. Kauk, M. & Hoffmann, C. Intramolecular and Intermolecular FRET Sensors for GPCRs –  
531 Monitoring Conformational Changes and Beyond. *Trends in Pharmacological Sciences*. **39**,  
532 123–135 (2018).
- 533 35. Donald, K., Pflieger, G. & Eidne, K. A. New Technologies : Bioluminescence Resonance Energy  
534 Transfer ( BRET ) for the Detection of Real Time Interactions Involving G-Protein Coupled  
535 Receptors. *Pituitary* **6**, 141–151 (2003).
- 536 36. Milligan, G. Applications of bioluminescence- and fluorescence resonance energy transfer to  
537 drug discovery at G protein-coupled receptors. *European Journal of Pharmaceutical Sciences*  
538 **21**, 397–405 (2004).
- 539 37. Angers, S. *et al.* Detection of Beta2 -adrenergic receptor dimerization in living cells using  
540 bioluminescence resonance energy transfer ( BRET ). *PNAS* **97**, 3684–3689 (2000).
- 541 38. Cottet, M. *et al.* BRET and time-resolved FRET strategy to study GPCR oligomerization: From  
542 cell lines toward native tissues. *Frontiers in Endocrinology* **3**, 1–14 (2012).
- 543 39. Chan, W.-Y. Disorders of sexual development caused by luteinizing hormone receptor mutant.  
544 *Journal of Peking University Health Sciences* **37**, 32–38 (2005).
- 545 40. Themmen, A. P. N. & Huhtaniemi, I. T. Mutations of gonadotropins and gonadotropin  
546 receptors: Elucidating the physiology and pathophysiology of pituitary-gonadal function.  
547 *Endocrine Reviews*. **21**, 551–583 (2000).
- 548 41. Rivero-Müller, A. & Huhtaniemi, I. Genetic variants of gonadotrophins and their receptors:  
549 Impact on the diagnosis and management of the infertile patient. *Best Practice and Research:*  
550 *Clinical Endocrinology and Metabolism*. **36**, (2022).
- 551

552 **Figure legends**

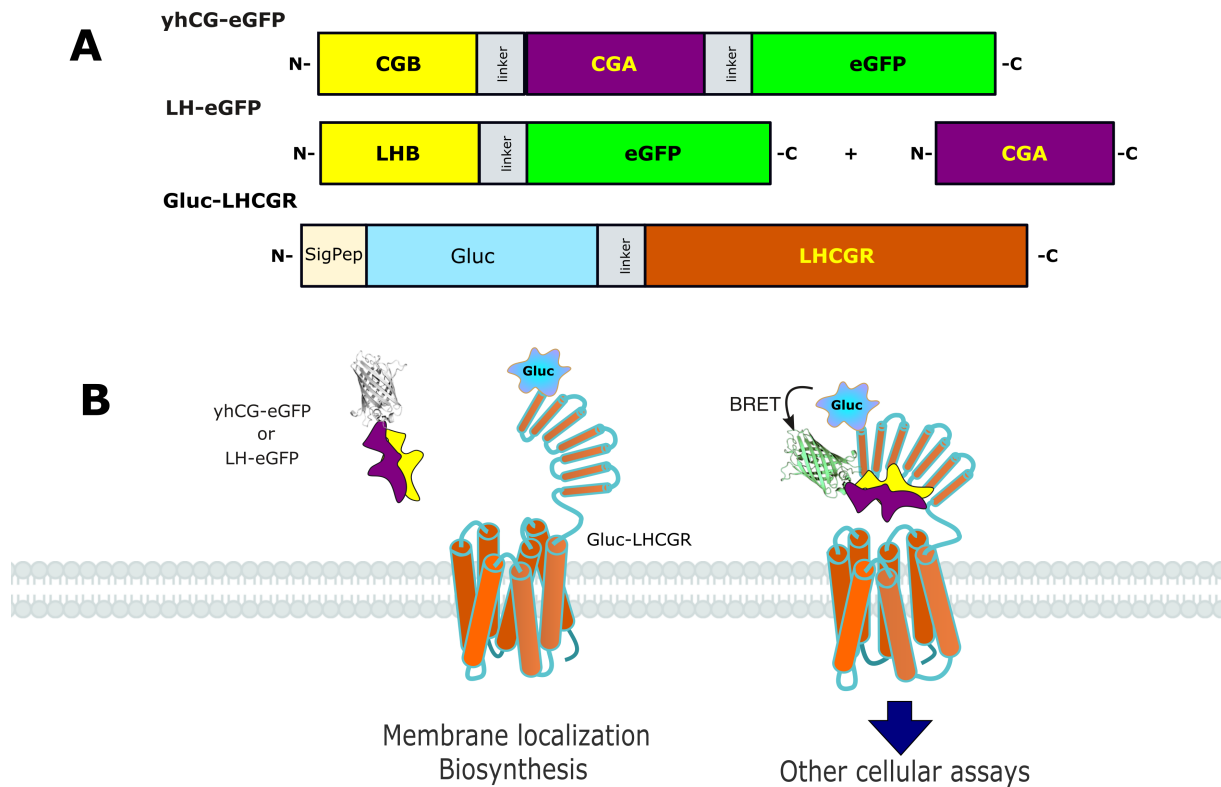

553

554 **Figure 1. Schematic representation of the BRET-based glycoprotein-LHCGR assay.** (A) Representation of  
555 the genetic constructs: the acceptor, a fusion of yhCG or LHB to eGFP via a short linker. The donor, in turn, was  
556 created by the fusion of Gluc to the extracellular domain of the LHCGR, where luciferase is preceded by the signal  
557 peptide of the LHCGR (SigPep). Gluc and LHCGR are also joined by a protein linker to allow flexibility. (B)  
558 Schematic representation of the resulting proteins and their cellular localization, as well as the resulting BRET  
559 phenomenon upon interactions between the acceptor and donor in the presence of coelenterazine – Gluc’s  
560 substrate.

561

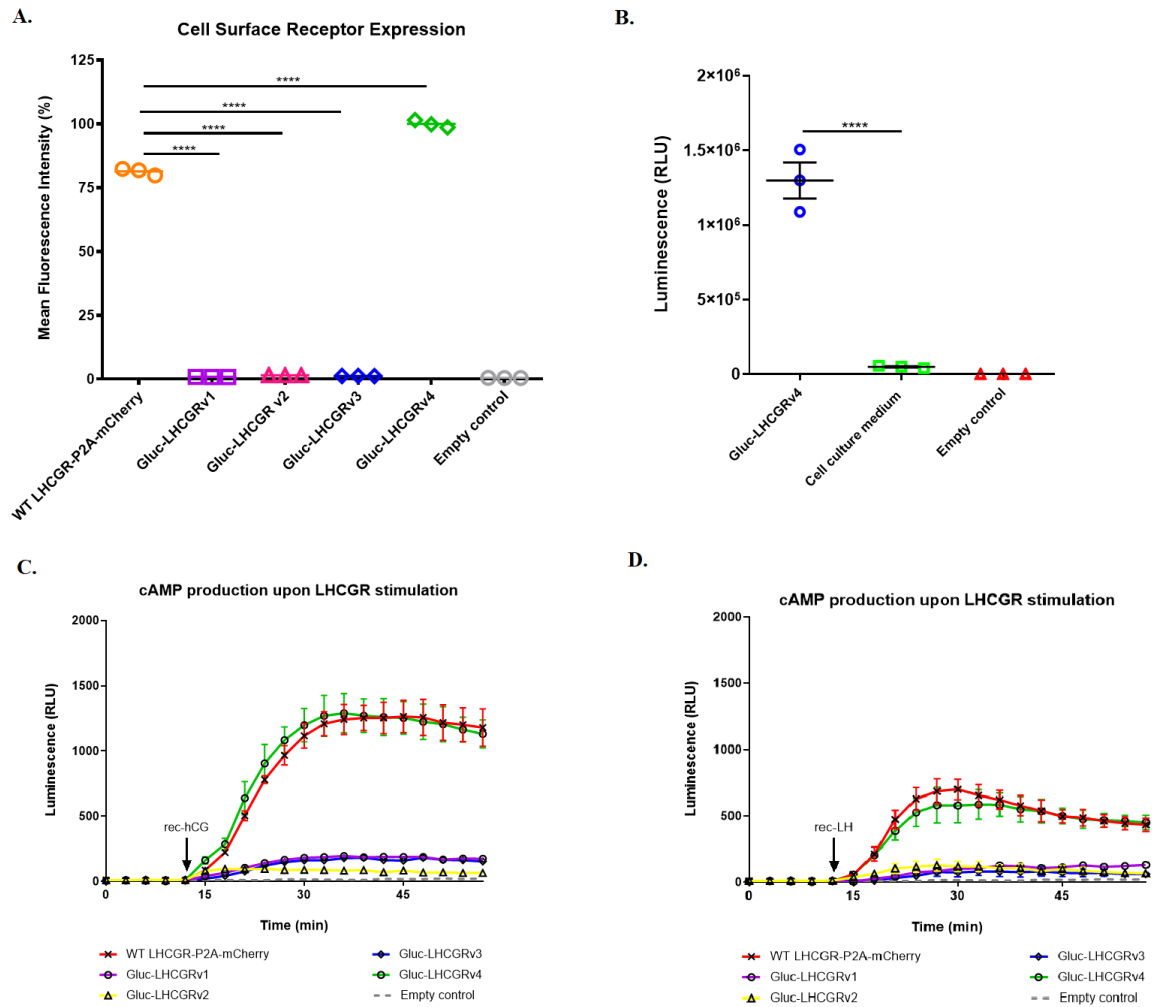

562

563 **Figure 2. Molecular characterization of Gluc-LHCGR variants.** (A) Flow cytometric analysis showed that the  
 564 membrane expressions of Gluc-LHCGRv1, Gluc-LHCGRv2 and Gluc-LHCGRv3 were negligible and thus  
 565 comparable to the expression of mock transfected control cells. On the contrary, the percentage median  
 566 fluorescence intensity (MFI) of the Gluc-LHCGRv4 was 1.23-fold higher as that of the LHCGR<sup>WT</sup>-P2A-mCherry.  
 567 Data is expressed as MFI ± standard error of the mean (SEM) of three independent experiments. \*\*\*\* p<0.0001.  
 568 (B) Luminescence measurement carried out directly in wells with cells expressing Gluc-LHCGRv4 revealed that  
 569 the luminescence was over 26-fold higher than the luminescence observed in the medium taken from  
 570 abovementioned wells. Data is representative of an experiment performed in triplicate and was repeated  
 571 independently at least three times. \*\*\*\* p<0.0001 (C-D) Stimulation of Gluc-LHCGRv4 with rec-hCG (C) or rec-  
 572 LH (D) resulted in cAMP production similar to that observed for LHCGR<sup>WT</sup>-P2A-mCherry. On the contrary, in  
 573 the case of other Gluc-LHCGR variants cAMP production was negligible. Data is representative of an experiment  
 574 performed in triplicate and was repeated independently at least three times.



575

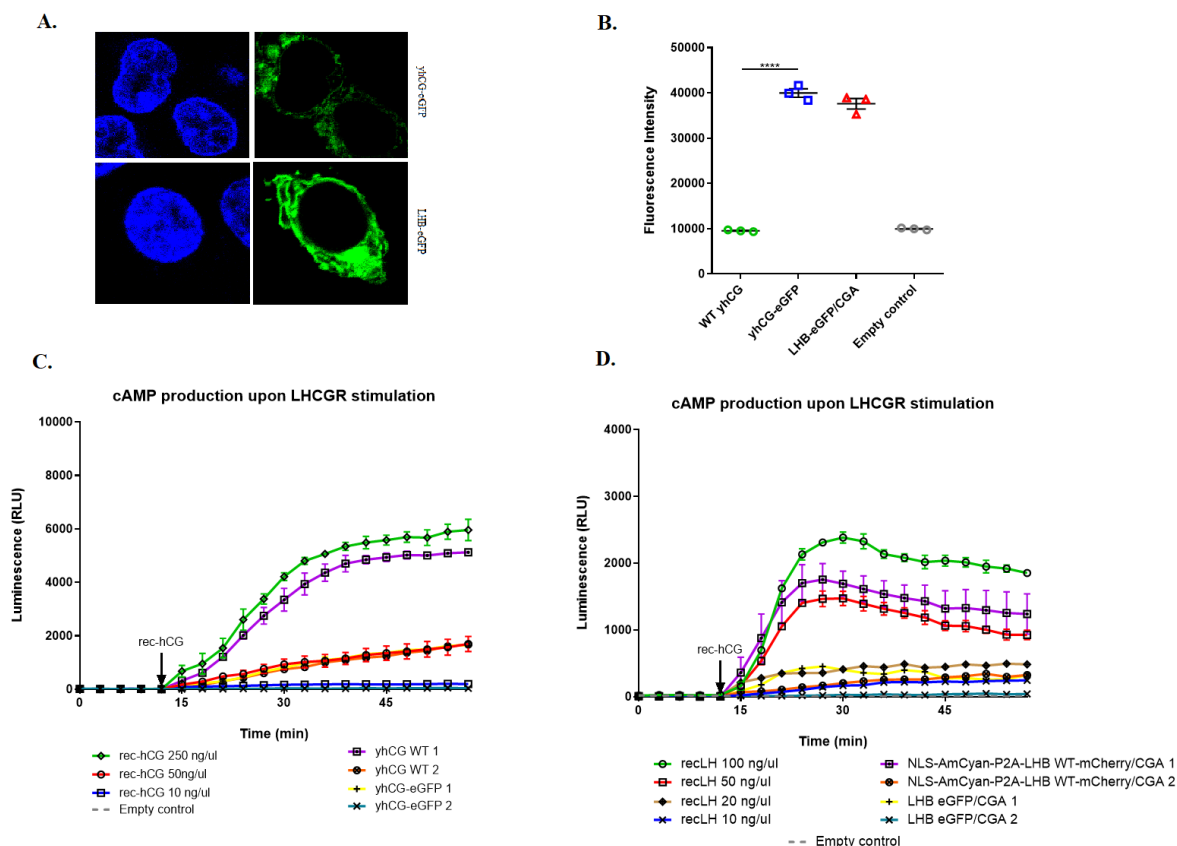

576

577 **Figure 3. Cellular localization of acceptor moieties and cAMP generation upon receptor stimulation with**  
 578 **eGFP-labeled ligands. (A)** Confocal microscopy revealed the presence of both yhCG-eGFP and LHB-eGFP/CGA  
 579 within the secretion route (ER/Golgi/vesicles). **(B)** Fluorescence intensity revealed that the fluorescence of  
 580 medium collected from the cells transfected with yhCG-eGFP or LHB-eGFP/CGA were significantly higher as  
 581 compared to the fluorescence of medium taken from the mock transfected control or untagged yhCG. The  
 582 fluorescence intensity of LH-eGFP was lower than that of yhCG-eGFP which suggests a poorer secretion. Data is  
 583 representative of an experiment performed in triplicate and was repeated independently at least three times. \*\*\*\*  
 584  $p < 0.0001$  **(C-D)** Both chimeric hormones, yhCG-eGFP and LH-eGFP (LHB-eGFP co-expressed with CGA)  
 585 retained their ability to activate the LHCGR. **(C)** LHCGR stimulation with concentrated yhCG<sup>WT</sup> resulted in  
 586 receptor activation comparable to that induced by stimulation with rec-hCG at concentration of 250ng/ $\mu$ l. In turn,  
 587 the use of concentrated eGFP-fused hCG resulted in LHCGR activation comparable to that observed for rec-hCG  
 588 at concentration of 50ng/ $\mu$ l. **(D)** In turn, the use of a concentrated medium containing NLS-AmCyan-P2A-LHB<sup>WT</sup>-  
 589 mCherry and CGA resulted in LHCGR activation similar to that induced by rec-LH at concentration of 50ng/ $\mu$ l,  
 590 whereas receptor stimulation with concentrated eGFP-fused LH resulted in its activation at a level similar to that

591 observed for the use of rec-LH at concentration of 20ng/ $\mu$ l. Data is representative of an experiment performed in  
592 triplicate and was repeated independently at least three times.

593

594

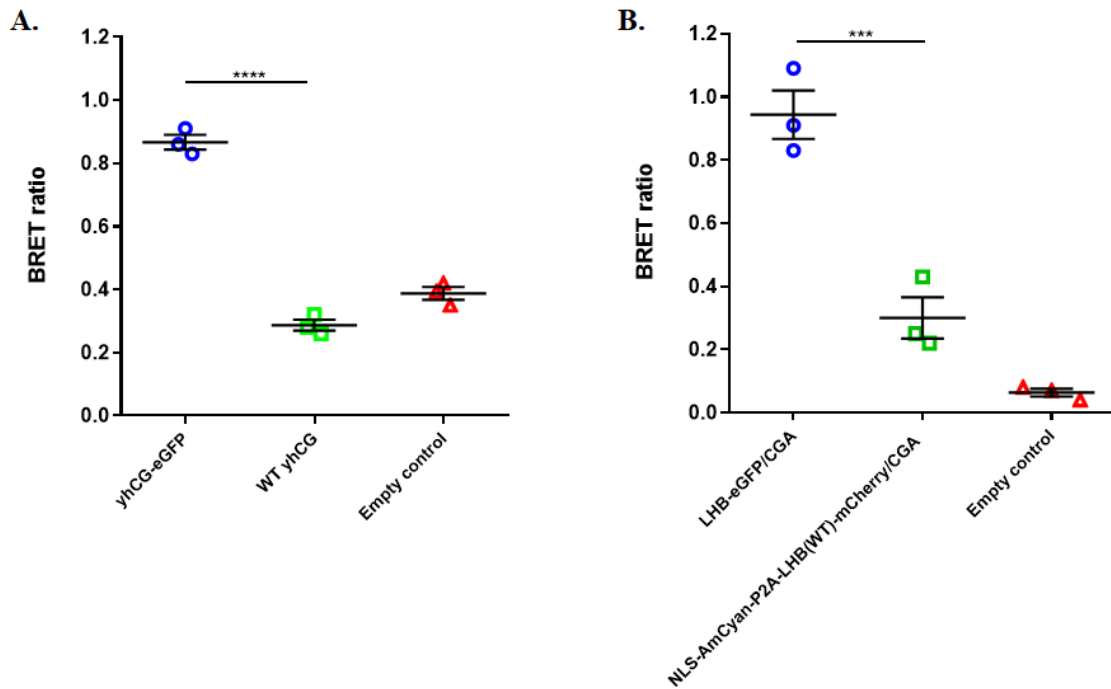

595

596 **Figure 4. Measurement of BRET.** (A) Stimulation of LHCGR with yhCG-eGFP resulted in an almost 3-fold  
597 higher acceptor:donor ratio as compared to the WT yhCG. BRET ratio calculated for the cells stimulated with WT  
598 yhCG was comparable to the BRET ratio calculated for hormone-free medium. (B) Calculation of acceptor:donor  
599 ratio showed that LHCGR stimulation with LH-eGFP resulted in an approximately 3.4-fold higher BRET ratio  
600 than in the case of stimulation with AmCyan-P2A-LHB<sup>WT</sup>-mCherry/CGA. Data is representative of an experiment  
601 performed in triplicate and was repeated independently at least three times. \*\*\*\* p<0.0001, \*\*\* p=0.0005

602

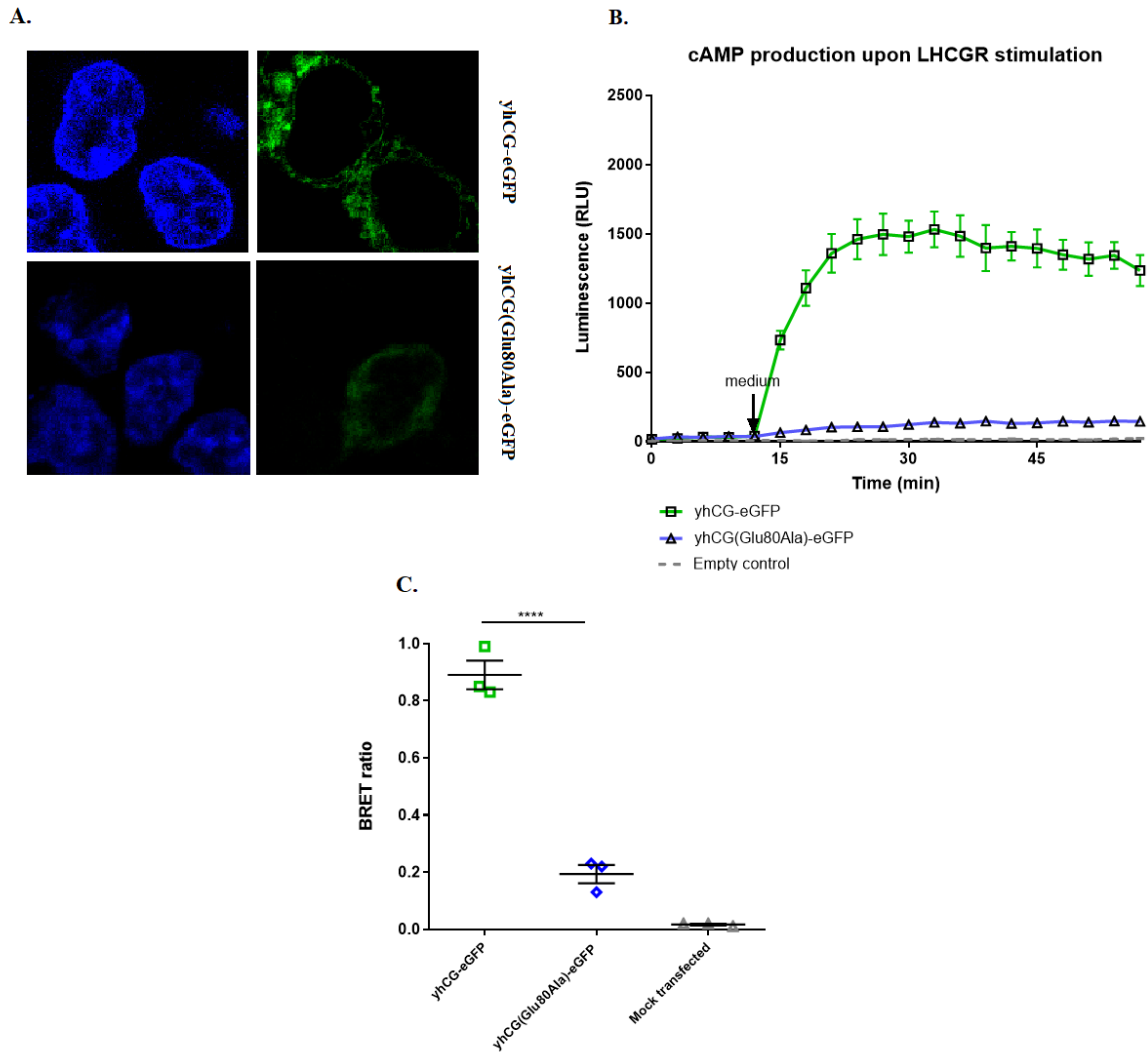

603

604 **Figure 5. Molecular characterization of yhCG Glu80Ala mutation.** (A) Confocal microscopy showed that the  
605 expression of yhCG<sup>Glu80Ala</sup>-eGFP was significantly decreased as compared to the yhCG<sup>WT</sup>-eGFP expression. (B)  
606 The results of GloSensor cAMP assay revealed that stimulation of GS-LHCGR with equimolar concentrations of  
607 yhCG<sup>Glu80Ala</sup>-eGFP resulted in 7.3-fold less cAMP production as compared to the yhCG<sup>WT</sup>-eGFP. (C) The  
608 acceptor:donor ratio obtained for the LHCGR stimulation with medium containing yhCG<sup>Glu80Ala</sup>-eGFP was 4.6-  
609 fold lower as compared to the BRET ratio calculated for the yhCG<sup>WT</sup>-eGFP. Data is representative of an  
610 experiment performed in triplicate and was repeated independently at least three times. \*\*\*\* p<0.0001

611

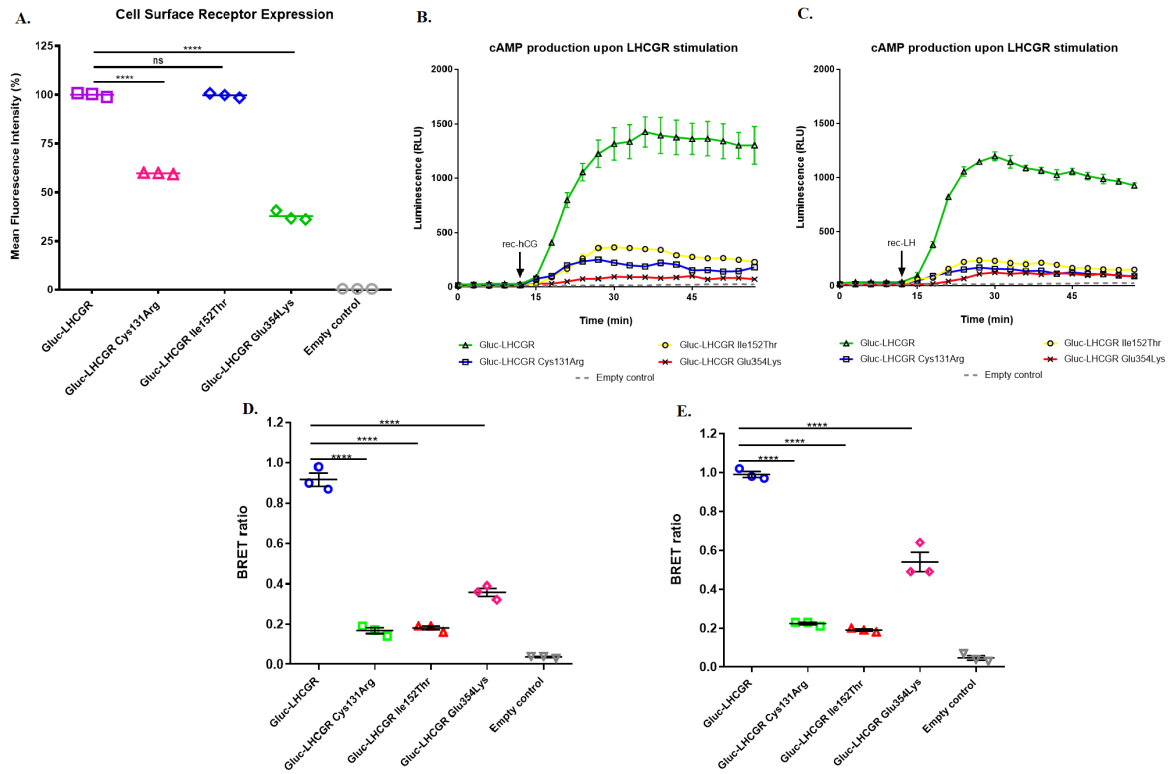

612

613 **Figure 6. Molecular characterization of LHCGR mutants.** (A) Flow cytometry analysis revealed that the  
614 membrane expression of Gluc-LHCGR<sup>Cys131Arg</sup> was 1.7-fold lower, whereas the expression of Gluc-LHCGR<sup>Ile152Thr</sup>  
615 was almost the same as the membrane expression of Gluc-LHCGR<sup>WT</sup>. The lowest mean fluorescence intensity was  
616 observed for Gluc-LHCGR<sup>Glu354Lys</sup> and it was 2.6-fold lower as compared to the Gluc-LHCGR<sup>WT</sup>. Data is  
617 expressed as MFI ± standard error of the mean (SEM) of three independent experiments. \*\*\*\* p<0.0001 (B)  
618 Activation of Gluc-LHCGR<sup>Cys131Arg</sup> and Gluc-LHCGR<sup>Ile152Thr</sup> with rec-hCG resulted in 7.4-fold and 4.9-fold lower  
619 cAMP production, respectively, as compared to Gluc-LHCGR<sup>WT</sup>. The lowest cAMP production was observed for  
620 the Gluc-LHCGR<sup>Glu354Lys</sup> and it was 11-fold lower than that noted for Gluc-LHCGR<sup>WT</sup>. (C) Similar results were  
621 obtained with LHCGR stimulation with rec-LH. Here, 6.2- and 4.2-fold lower receptor activation was observed  
622 for Gluc-LHCGR<sup>Cys131Arg</sup> and Gluc-LHCGR<sup>Ile152Thr</sup>, respectively. Similarly, the lowest cAMP production was  
623 observed for Gluc-LHCGR<sup>Glu354Lys</sup>, which was 14.4-fold lower as compared to Gluc-LHCGR<sup>WT</sup>. (D) BRET assay  
624 revealed that the acceptor:donor ratio obtained for the Gluc-LHCGR<sup>Cys131Arg</sup> was 5.5-fold lower, whereas the  
625 BRET ratio calculated for Gluc-LHCGR<sup>Ile152Thr</sup> was 5.1-fold lower as compared to the Gluc-LHCGR<sup>WT</sup> stimulated  
626 with rec-hCG. On the contrary, acceptor:donor ratio calculated for the Gluc-LHCGR<sup>Glu354Lys</sup> stimulated with rec-  
627 hCG was 2.6-fold lower as compared to the WT. (E) In the case of stimulation with rec-LH, similar values were  
628 obtained for the Gluc-LHCGR<sup>Cys131Arg</sup> and Gluc-LHCGR<sup>Ile152Thr</sup>. The acceptor:donor ratio calculated for the Gluc-

629 LHCGR<sup>Cys131Arg</sup> was 4.4-fold lower and 5.2-fold lower for the latter mutant as compared to the Gluc-LHCGR<sup>WT</sup>.  
630 The BRET ratio obtained for the Gluc-LHCGR<sup>Glu354Lys</sup> stimulated with the rec-LH was 1.8-fold lower as compared  
631 with the Gluc-LHCGR<sup>WT</sup>. Data is representative of an experiment performed in triplicate and was repeated  
632 independently at least three times. \*\*\*\* p<0.0001.

633

634

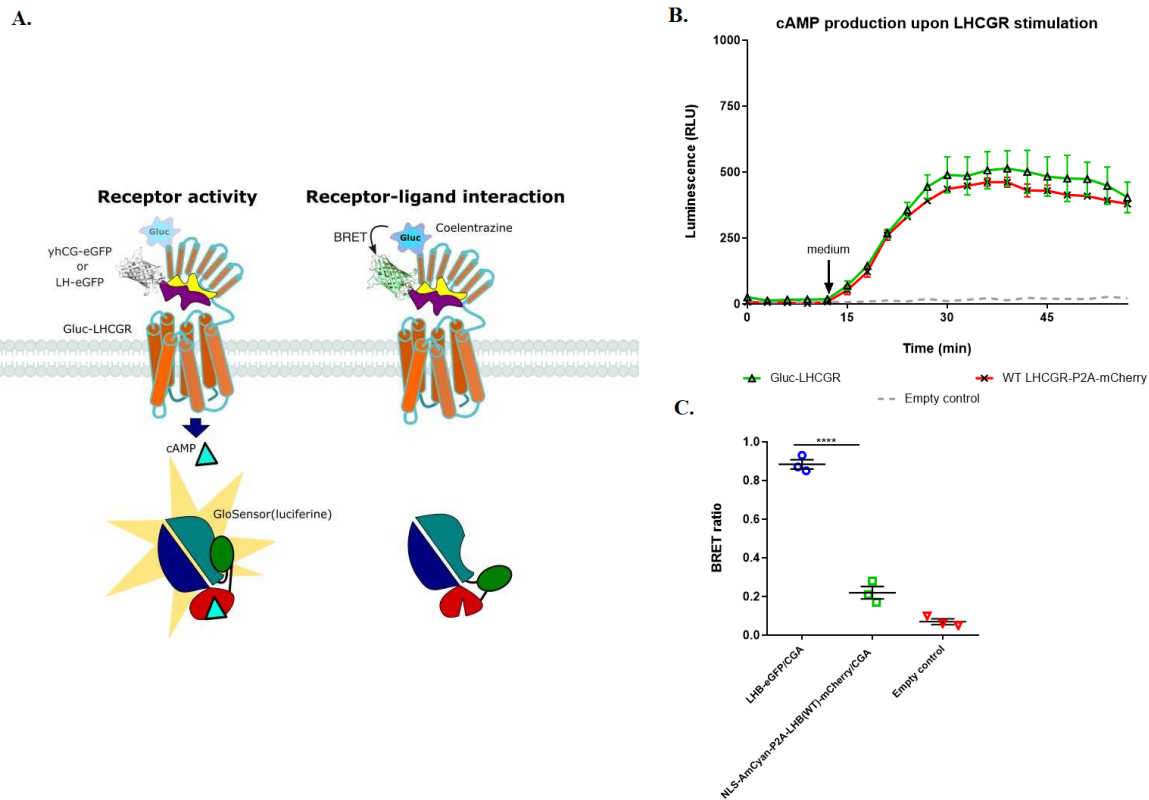

635

636 **Figure 7. Coupling BRET assay with cAMP GloSensor assay.** (A) Schematic representation of the parallel or  
637 sequential analyses. (B) Stimulation of Gluc-LHCGR with eGFP-fused LH resulted in cAMP production similar  
638 to that observed for LHCGR<sup>WT</sup>-P2A-mCherry. Data is representative of an experiment performed in triplicate  
639 and was repeated independently at least three times. (C) Calculation of BRET ratio revealed that Gluc-LHCGR  
640 stimulation with LH-eGFP resulted in 4-fold higher BRET ratio than in the case of stimulation with unlabeled  
641 hormone. Data is representative of an experiment performed in triplicate and was repeated independently at least  
642 three times. \*\*\*\* p<0.0001.
